1 **ADVANCED AUTOLOGOUS LOWER DERMAL SLING TECHNIQUE FOR**  
2 **IMMEDIATE BREAST RECONSTRUCTION SURGERY IN SMALL AND NON-**  
3 **PTOTIC BREASTS**

4  
5 **AUTHOR NAMES AND AFFILIATIONS**

6 Chaitanyanand B. Koppiker M.D.<sup>1\*</sup>, Aijaz Ul Noor Ph.D.<sup>1</sup>, Santosh Dixit Ph.D.<sup>1</sup>, Laleh  
7 Busheri<sup>1</sup>, Gautam Sharan M.D.<sup>2</sup>, Upendra Dhar M.D.<sup>1</sup>, Hari Kiran Allampati M.D.<sup>3</sup> Smeeta  
8 Nare<sup>1</sup>, Nutan Gangurde<sup>1</sup>.

9 <sup>1</sup>Orchids Breast Health Clinic, Prashanti Cancer Care Mission, 1&2, Kapilavastu, Senapati Bapat  
10 Road, Pune, Maharashtra, Post code :411016, India.

11 <sup>2</sup>Department of Radiation Oncology, Inlaks and Budhrani Hospital, Pune-411001, India,

12 <sup>3</sup>Ruby Hall Clinic, Pune, Maharashtra, India, 411040

13  
14 Email:

15 [aeijazul@gmail.com](mailto:aeijazul@gmail.com); [lalehbusheri@gmail.com](mailto:lalehbusheri@gmail.com); [sgdixit@gmail.com](mailto:sgdixit@gmail.com);

16 [dr.gautamsharan@gmail.com](mailto:dr.gautamsharan@gmail.com); [upendradhar@hotmail.com](mailto:upendradhar@hotmail.com); [dr.harikiran89@gmail.com](mailto:dr.harikiran89@gmail.com);

17 [smeetanare@hotmail.com](mailto:smeetanare@hotmail.com), [dr.nutang@gmail.com](mailto:dr.nutang@gmail.com)

18

19

20 **The Article Type:** Original Article (Clinical Original)

21

22 **\*CORRESPONDING AUTHOR**

23 Chaitanyanand B. Koppiker M.D.

24 Medical Director, Orchids Breast Health Clinic,

25 Prashanti Cancer Care Mission,

26 1-2, Kapilvastu, Senapati Bapat Road,

27 Pune, Maharashtra, Post code: 411016, India.

28 Phone: +91 98226 74040 (M)

29 Email : obs.koppiker@gmail.com

30 **ABSTRACT**

31 **Background:** Breast reconstruction with an autologous lower dermal sling (ALDS) is an  
32 established one-stage procedure in patients with moderate to large ptotic breasts. However, this  
33 technique is difficult to perform in small and non/minimally ptotic breasts. We describe our  
34 experiences from a single institution about a novel Advanced Autologous Lower Dermal Sling  
35 (A-ALDS) technique for reconstruction in small breasts.

36 **Methods:** We performed one stage nipple/skin sparing mastectomies in 61 patients with  
37 immediate reconstruction either by conventional immediate breast reconstruction surgery or  
38 A-ALDS technique.

39 **Results:** Mean age of study patients was 46.9 years. We observed significantly better cosmetic  
40 score and lower immediate complication rate *vis-a-vis* skin necrosis, implant loss with the A-  
41 ALDS technique (i.e., nil versus 3 in Conventional Immediate Breast Reconstruction Surgery -  
42 IBRS). 40 patients completed 12 months follow-up. The PROMs- Patient Reported Outcomes  
43 Measures (Breast-Q) revealed good to excellent scores for satisfaction with breast, cosmetic  
44 outcome and psychosocial well-being in patients operated with both these techniques. However,  
45 sexual well-being was significantly better in the A-ALDS group.

46 **Conclusion:** The A-ALDS is a novel, cost-effective and safe technique for immediate one stage  
47 implant-based reconstruction for small breasts. It provides a dermal barrier flap and hence,  
48 ensures less complications, excellent cosmetic results and patient satisfaction.

49

50

51

52 **Keywords:** Breast Cancer; Small Breast; Advanced-Autologous Lower Dermal

53 Sling; Immediate Breast Reconstruction Surgery; Patient Reported Outcomes

54 Measures.

55 **Abbreviations (According to Appearance in the Text)**

56 Autologous Lower Dermal Sling: ALDS

57 Immediate Breast Reconstruction Surgery: IBRS

58 Breast Cancer: BC

59 Infra-mammary Fold: IMF

60 Acellular Dermal Matrices: ADMs

61 Advanced-Autologous Lower Dermal Sling: A-ALDS

62 Patient Reported Outcome Measures: PROMs

63

64

65

66

67

68

69

70

71

72

73

## 74 INTRODUCTION

75 The well-established autologous lower dermal sling (ALDS) is an ideal technique for implant-  
76 based immediate breast reconstruction surgery (IBRS) in breast cancer (BC) patients with  
77 moderate-to-large sized breasts with significant ptosis (Grade 2+) in which the distance from the  
78 nipple to the infra-mammary fold (IMF) may be significantly greater than 5 -7 cm. The ALDS  
79 provides robust stability to the implant ensuring excellent contouring, projection and fullness of  
80 the lower pole of the reconstructed breast with correction of ptosis. This approach reduces the  
81 risk of a high riding implant, provides excellent cosmetic results and ensures good symmetry.  
82 Therefore, ALDS is now considered as a safe and cost-effective single stage reconstructive  
83 technique especially in moderate-to-large ptotic breasts [1-3].

84 However, implant-based breast reconstruction for small and non-ptotic breasts is a surgical  
85 challenge due to non-availability of excess lower pole length that aids in the creation of an  
86 appropriately sized dermal sling. Conventionally, breast reconstruction in such scenarios is  
87 performed by placing the implant either in a complete or partial sub-muscular pocket. These  
88 techniques have been shown to result in sub-optimal cosmetic outcomes that were attributed to  
89 poor expansion and tightness of the inferior pole [4]. As a result, it is now a common practice  
90 employed by several oncoplastic surgeons to use acellular dermal matrices (ADM)s that function  
91 as a sling to cover the implant inferiorly and provide robust support to the inferior pole [4].

92 In developing countries such as in India, ADMs are not available and their high cost can prohibit  
93 its use in breast reconstruction. Hence, in such low-resource settings, we have initially  
94 approached reconstruction in minimally ptotic or non-ptotic small breasts by placing the implant  
95 in a sub-muscular pocket that is formed by pectoralis major muscle above, the fascia or  
96 superficial fibers of the serratus anterior muscle laterally and the fascia over rectus abdominis

97 muscle inferiorly. Later, we developed a technique of Advanced-Autologous Lower Dermal  
98 Sling (A-ALDS) to provide a double layer of vascularized tissue cover over the implant  
99 inferiorly. It has been previously reported in the ALDS procedure, that dermal sling provides an  
100 advantage over ADMs as it acts as a vascularized flap eliminating the risk of implant exposure  
101 even if superficial skin necrosis does occur [1-2]. Therefore, the ALDS technique has been  
102 utilized routinely to improve breast reconstruction outcomes. Similarly, our modified A-ALDS  
103 technique was able to maintain the natural breast shape, projection and symmetrization of the  
104 reconstruction with respect to the opposite breast thereby, obviating the need for contralateral  
105 surgery.

106 In this study, we report the application of this novel A-ALDS technique for reconstruction in  
107 patients with small breasts. Furthermore, we present the post-surgical outcomes in our study  
108 patients who have undergone either A-ALDS technique or conventional IBRS.

109

110 We present the following article/case in accordance with the STROBE reporting checklist.

111

112

113

114

115

116

117

118

119

## 120 MATERIAL AND METHODS

### 121 Study Design

122 This is a longitudinal cohort study involving a retrospective analysis of prospective data from a  
123 single institution. This study was approved by an independent ethics committee associated with  
124 the institution. Patients were considered eligible for analysis if they underwent unilateral and  
125 bilateral mastectomies with implant-based IBRS (Immediate Breast Reconstruction Surgery) and  
126 fulfilled the criteria laid down for a small breast. Small breast for the purpose of this study was  
127 defined as the one with a cup size of B or smaller and / or mastectomy weight of less than 350gm  
128 with either no or normal ptosis.

129 Written informed consent was obtained from all patients for collection of study-relevant medical  
130 data associated with disease management and routine follow-up visits. The study recruitment  
131 period was defined as the day informed consent was obtained from the patient till one year of  
132 follow up. Study sample size represented all eligible cases during the study period from year  
133 2016 until 2018. Data collection included demography, medical history, clinicopathological  
134 characteristics, surgical notes, post-surgery evaluations and follow-up details for patient reported  
135 outcome measures (PROMs) and aesthetic scores. To minimise bias in data collection, Standard  
136 Operating Procedures (SOPs) were implemented by well-trained researchers.

137 During the study period, a total of 61 BC patients with small breasts underwent implant-based  
138 IBRS at our breast unit. 3 patients underwent bilateral mastectomies. Only those patients with  
139 small breasts who were recommended for mastectomy and opted for IBRS were included in the  
140 study. The selection criteria for A-ALDS (Advanced-Autologous Lower Dermal Sling) or  
141 conventional IBRS as an appropriate surgical technique were as follows: (a) Conventional IBRS  
142 was performed when the tumor was located in the upper outer quadrant and lower quadrant close

143 to the skin, warranting skin removal with the tumor. (b) The A-ALDS procedure for IBRS was  
144 applied to all other patients including those that had the presence of tumor in the lower pole but  
145 at an optimal distance from skin. In such situations, the skin could be preserved to create the  
146 desired dermal sling. The surgical margins especially – the anterior margins were evaluated by  
147 frozen sections in selected cases and re-ascertained on the paraffin sections in all cases.

148 Out of these 61 patients, 40 completed one-year post-surgery follow-up (22 with conventional  
149 IBRS and 18 with A-ALDS) and were analyzed for surgical outcomes and PROMs. These  
150 patients underwent chemotherapy and/or radiation therapy treatment according to NCCN  
151 guidelines under the supervision of a multidisciplinary clinical team.

### 152 **Conventional IBRS Technique**

153 Conventional IBRS (i.e. one stage sub muscular implant reconstruction) involves placement of  
154 the breast implant in a sub muscular pocket. The mastectomy is performed preserving the skin  
155 along with nipple areola complex in which the lower extent of mastectomy is the inframammary  
156 fold (IMF). The conventional IBRS technique involves splitting pectoralis major muscle in the  
157 middle along its fibers. This is in contrast to the usual practice of most plastic surgeons that  
158 involves lifting the pectoralis major starting from its lateral edge and then dissecting beneath it to  
159 create a sub-muscular pocket. Laterally, the dissection is carried under the fascia/superficial  
160 fibers of serratus anterior, hence providing a continuous pocket laterally. The dissection then  
161 continues under the fascia of lower thoracic and upper abdominal wall approximately 2 cm  
162 below IMF. This procedure ensures the provision of an appropriate cover to the implant to  
163 prevent high riding and imparts fullness to the lower quadrant of the reconstructed breast. In this  
164 way, the implant is partially covered by muscle and partially by fascia. We have adopted a single  
165 stage procedure by inserting a dual lumen expendable implant so as to create lower pole fullness.



## 166 **Advanced-Autologous Lower Dermal Sling (A-ALDS) Technique**

167 The A-ALDS procedure is described for implant-based reconstruction in patients with small non-  
168 ptotic or minimally ptotic breasts where the distance of the lower segment of the breast is  
169 inadequate to perform the regular ALDS technique.

170 The A-ALDS technique begins by first marking out the usual pre-operative landmarks on the  
171 breast with appropriate measurements. The IMF is marked and the IMF-to-nipple distance is  
172 ascertained (typically small; 5 to 7 cm). The desired dermal sling (breadth of 3 to 4 cm) is  
173 marked out in a semi-circular fashion above the IMF on the lower pole of the breast. This area is  
174 de-epithelialized to constitute the lower dermal sling. The mastectomy proceeds from above the  
175 lower dermal sling and the flaps are raised in the appropriate subcutaneous plane maintaining the  
176 sub-dermal blood supply of the flaps. At the areola, the plane becomes more superficial and then  
177 dips into the nipple to core out the ducts as recommended [5]. The lower dermal sling is  
178 dissected off the lower breast tissue in the correct plane up to the IMF. Then, mastectomy is  
179 performed and the nipple is cored out. During this procedure, the lower dermal sling is then  
180 advanced by mobilizing the skin and subcutaneous tissue above the fascia of the lower thoracic  
181 and upper abdomen by 3 to 4 cm thereby, advancing the dermal sling to cover the implant. We  
182 recommend that during this mobilization the perforators of medial and lateral thoracic region  
183 should be maintained scrupulously as they contribute significantly to the vascularity of A-ALDS  
184 flap. The advanced skin mobilized (from lower thoracic and upper abdomen) equals the breadth  
185 of the dermal sling (i.e. 3 to 4 cm), maintains the required ideal length of the lower segment and  
186 helps to symmetrize the reconstructed breast to the contralateral side. Finally, the IMF is  
187 recreated by anchoring the mobilized skin (from the lower thoracic and upper abdominal wall)  
188 with 3 sub-cutaneous sutures to the chest wall at the level of the original IMF.

189 After this step, a breast pocket is created by lifting up the pectoralis major muscle from the chest  
190 wall and cutting its attachments inferiorly. The pocket is continued under the fascia and  
191 superficial fibers of the serratus anterior muscles without detaching the pectoralis major muscle  
192 at its lateral attachment providing a continuous uninterrupted pocket laterally. Medially, the  
193 dissection is carried under the pectoralis major muscle up-to the medial perforators without  
194 damaging them. An appropriate size and type of dual-lumen anatomical implant is placed in the  
195 resultant submusculardermal pocket. To avoid excess tension inside the submuscular pocket, the  
196 volume of the pocket is kept proportionate to the skin envelope and to implant dimension.  
197 In the final surgical step, the inferior border of pectoralis major muscle and superficial fibers of  
198 serratus anterior or its fascia muscle is sutured to the de-epithelialized A-ALDS generated  
199 earlier. The suction drains are placed under skin flaps of the patient and the skin flap is sutured  
200 down at the infra-mammary crease (Figure 1A a-e) (Online Resource 1-3).

## 201 **Study Assessments**

202 Surgical outcomes were assessed by a team of onco-surgeons for post-surgery outcomes. Early  
203 complications such as hematoma, seroma, wound dehiscence and wound infection were  
204 recorded. Complications were classified as ‘major’ when they required surgical intervention and  
205 ‘minor’ when they were managed conservatively. Major immediate complications include  
206 implant loss and skin dehiscence that required re-suturing. Minor complications include minor  
207 skin/wound dehiscence, minor flap necrosis healing with secondary intention and  
208 epidermolysis.

209 The late complications such as capsular contracture and late infections were also noted. The  
210 capsular contracture was assessed using the modified Baker classification system [6]. While,  
211 Baker 3 and 4 observations were considered as major complications, Baker 2 observations were

212 considered as minor. We also noted the time between completion of the surgery and start of the  
213 adjuvant therapy to ascertain any delays in the adjuvant therapy.

214 The Patient reported Outcome Measures (PROMs) were used to evaluate patient satisfaction and  
215 quality of life after IBRS. To assess PROMs, a standardized Breast-Q questionnaire was utilized.  
216 The Breast-Q reconstruction module was divided into multiple independent scales. Higher scores  
217 indicate greater patient satisfaction and functionality [7, 8]. PROMs patient interview was  
218 conducted by a well-trained interviewer after obtaining informed consent.

219 Aesthetic outcomes were measured with 5 different variables that included breast reconstruction  
220 volume, contour, implant placement, scarring, and appearance of inframammary fold [9]. Post-  
221 operative cosmetic assessment was performed by the clinical team during visual inspection of the  
222 patient in the sitting position. Photographic data were scored by 3 independent clinical observers  
223 using the 3-point scale (Online Resource 4). Two of them were not directly involved with direct  
224 patient care. Aesthetic scores of 5 different variables were pooled and analyzed for statistical  
225 significance.

## 226 **Statistical Analysis**

227 Statistical analysis was performed using Student's *t*-test and a p-value of <0.05 was considered  
228 significant.

## 229 **RESULTS**

### 230 **Representative Case Study**

231 A patient between 20-40 years age group with B-cup breasts and no ptosis presented with a  
232 lump in the left breast. On radiological investigations, it showed multicentric tumors in the  
233 upper outer quadrant and diffuse microcalcifications. She underwent nipple-areola-sparing  
234 mastectomy followed by IBRS with A-ALDS technique. Post-surgery histo-pathological

235 examination revealed that the sentinel lymph nodes were free of tumor (0/3) and with clear  
236 tumor margins. The intraoperative, pre- and post-surgery images for this patient are depicted in  
237 Figure 1A, 1B, 1C and 1D respectively.

238

### 239 **Study Cohort Demography**

240 40 patients with small breasts who completed 12 months post-surgery follow-up were included  
241 in the study. Of these, 22 patients underwent implant-based conventional IBRS and 18 patients  
242 underwent surgeries with the A-ALDS technique. Out of 40, data of 39 patients was available.  
243 Demographic distribution of patients and clinico-pathological characteristics are summarized  
244 in Figure 2 and Table 1. None of the patients in our study cohort experienced any delays in  
245 their adjuvant therapies.

246

247

**Table 1: Demography and Clinico-Pathological Profile of Study Participants**

| <b>Variables</b>       | <b>Data Sources</b>                           | <b>Class intervals</b> | <b>Conventional IBRS<br/>n = 22*<br/>Number, (%)</b> | <b>IBRS with A-ALDS<br/>n = 18<br/>Number, (%)</b> |
|------------------------|-----------------------------------------------|------------------------|------------------------------------------------------|----------------------------------------------------|
| <b>Age (Years)</b>     | Scheduled Interview (Post informed consent)   | <b>&lt;=35</b>         | 4 (18.1 )                                            | 3 (16.7)                                           |
|                        |                                               | <b>36-50</b>           | 7 (31.8)                                             | 9 (44.4)                                           |
|                        |                                               | <b>&gt;=51</b>         | 10 (45.4)                                            | 6 (33.3)                                           |
|                        |                                               | <b>Mean Age</b>        | 45.6                                                 | 48.2                                               |
| <b>Tumor Pathology</b> | Clinico-Pathological Report (Histo-pathology) | <b>IDC</b>             | 16 (72.7)                                            | 9 (50.0 )                                          |
|                        |                                               | <b>DCIS</b>            | 2 (9.1)                                              | 2 (11.1)                                           |
|                        |                                               | <b>IDC + DCIS</b>      | 2 (9.1)                                              | 7 (38.8 )                                          |
|                        |                                               | <b>Others</b>          | 1 (4.5)                                              | -                                                  |
| <b>ER</b>              | Clinico-Pathological Report (IHC)             | <b>Positive</b>        | 18 (81.8)                                            | 15 (83.3)                                          |
| <b>PR</b>              | Clinico-Pathological Report (Histo-pathology) | <b>Positive</b>        | 6 (27.3)                                             | 13 (72.2)                                          |
| <b>Her2</b>            | Clinico-Pathological Report (Histo-pathology) | <b>Positive</b>        | 3 (13.6)                                             | 2 (11.1)                                           |

248

|                               |                                                                                  |            |            |           |
|-------------------------------|----------------------------------------------------------------------------------|------------|------------|-----------|
| <b>TNBC</b>                   | Clinico-Pathological Report (Histo-pathology)                                    | -----      | 2 (9.1)    | 2 (11.1)  |
| <b>Grade</b>                  | Clinico-Pathological Report (Histo-pathology)                                    | <b>I</b>   | 2 (9.1)    | -         |
|                               | Clinico-Pathological Report (Histo-pathology)                                    | <b>II</b>  | 15 (68.2)  | 15 (83.3) |
|                               | Clinico-Pathological Report (Histo-pathology)                                    | <b>III</b> | 4 (18.2)   | 3 (16.7)  |
| <b>Stage</b>                  | Pathology Lab Report (according to AJCC staging guidelines 7 <sup>th</sup> ed)   | <b>I</b>   | 9 (40.9 )  | 4 (22.2 ) |
|                               | Pathology Lab Report and according to AJCC staging guidelines 7 <sup>th</sup> ed | <b>II</b>  | 4 (18.2 )  | 10 (55.5) |
|                               | Pathology Lab Report and according to AJCC staging guidelines 7 <sup>th</sup> ed | <b>III</b> | 8 (36.4)   | 4 (22.2)  |
| <b>Neo – Adjuvant Therapy</b> | Medical Oncologist consultation and records                                      |            | 4 (18.2)   | 4 (22.2)  |
| <b>Adjuvant Therapy</b>       | Medical Oncologist consultation and records                                      |            | 21 (95.5)  | 15 (83.3) |
| <b>Radiation Therapy</b>      | Radiation Oncologist consultation and records                                    |            | 12 (54.5 ) | 8 (44.4)  |

249 \* Data available for 21 patients only.

250 **PROMs and Aesthetic Score**

251 PROMs data was collected from the study participants at 12 months post-surgery with the  
252 Breast-Q questionnaire. Out of 40 study participants, 36 (90%) responded to the questionnaire.  
253 PROMs data indicated that all study participants irrespective of the type of reconstruction,  
254 reported good-to-excellent satisfaction for the breast cosmetic outcomes and psychosocial  
255 well-being.

256 However, we found that the Breast-Q parameters scored higher for A-ALDS patients as  
257 compared to conventional IBRS.

258 The sexual well-being scores were significantly higher for the A-ALDS patients ( $62.8 \pm 21.9$   
259 versus  $52.2 \pm 28.4$ ) in comparison to conventional IBRS procedure ( $p = 0.0139$ ). In addition,  
260 A-ALDS group scored significantly higher for aesthetic score over conventional IBRS group  
261 (i.e.,  $6.7 \pm 1.3$  versus  $4.6 \pm 2.3$ ;  $p=0.0009$ ) (Table 2).

262

263

264 **Table 2: Inter-Group Comparison of PROMs (Conventional-IBRS versus A -ALDS) and**  
 265 **Aesthetic Score**

| S. No. | Variables       | Conventional-IBRS         | IBRS with A - ALDS | p-value     |         |
|--------|-----------------|---------------------------|--------------------|-------------|---------|
| 1.     | Breast-Q        | Satisfaction with Breast  | 69.2 ± 22.6        | 69.4 ± 14.3 | 0.7271  |
| 2.     |                 | Satisfaction with Outcome | 80.0 ± 24.2        | 86.9 ± 13.1 | 0.3017  |
| 3.     |                 | Psychosocial Well Being   | 71.2 ± 26.2        | 80.4 ± 21.6 | 0.2769  |
| 4.     |                 | Sexual Well Being         | 52.2 ± 28.4        | 62.8 ± 21.9 | 0.0139* |
| 5.     | Aesthetic Score | 4.6 ± 2.3                 | 6.7 ± 1.3          | 0.0009*     |         |

266 ( Data: Mean + S.D.; \* Statistically Significant )

267 **Assessment of Post-IBRS Complications**

268 No major complications (immediate or /delayed) were observed in the patients that underwent  
 269 A-ALDS (n=18) procedure. However, out of the 22 patients that underwent conventional IBRS,  
 270 immediate major complications were observed in 3 patients (13.6 %) with implant loss and  
 271 delayed major complications in 1 patient (4.5 %) with Grade III capsular contracture (Table  
 272 3). No delay in time between completion of the surgery and start of the adjuvant therapy were  
 273 observed in patients from both groups.

274 As described above, 18 patients with small breasts from our study cohort have successfully  
 275 undergone the reconstruction with the novel A-ALDS technique without any major



276 complications. These observations indicate that the use of A-ALDS procedure during IBRS is a  
277 safe and feasible technique.

278

279 **Table 3: Summary of Post-Operative Complications**

|                            | <b>Variables</b> |                                                                              | <b>Conventional - IBRS; (n = 22) Number, (%)</b> | <b>A-ALDS; (n = 18) Number, (%)</b> |
|----------------------------|------------------|------------------------------------------------------------------------------|--------------------------------------------------|-------------------------------------|
| <b>Major Complications</b> | <b>Immediate</b> | <b>Implant Loss</b>                                                          | 3 (13.6)                                         | 0 (0)                               |
|                            |                  | <b>Skin dehiscence requiring re-suture or skin graft or minor local flap</b> | 0 (0)                                            | 0 (0)                               |
|                            | <b>Delayed</b>   | <b>Capsular Contracture : Severe (Grade III)</b>                             | 1 (4.5)                                          | 0 (0)                               |
|                            |                  | <b>Total</b>                                                                 | 4 (18.1)                                         | 0 (0)                               |
| <b>Minor Complications</b> |                  | <b>Capsular Contracture : Mild (Grade I / II)</b>                            | 2 (9.09)                                         | 1 (5.5)                             |
|                            |                  | <b>Minor skin / wound dehiscence (treated conservatively)</b>                | 3 (13.6)                                         | 1 (5.5)                             |
|                            |                  | <b>Late infections (treated with antibiotics)</b>                            | 2 (9.09)                                         | 0 (0)                               |
|                            |                  | <b>Total</b>                                                                 | 7 (31.78)                                        | 2 (11.0)                            |

280

281

282 **DISCUSSION**

283 Breast reconstruction in patients with small-breasts is challenging because of insufficient tissue  
284 access in the lower pole to create a dermal sling. In this study, we have described in detail a  
285 novel A-ALDS technique, which represents an innovative modification to the routine lower  
286 dermal sling procedure for application in the reconstruction of small, non-ptotic breasts. In our  
287 study cohort, we have observed an early trend towards lower rates of capsular contracture  
288 (Grade II and III) and implant loss in A-ALDS patients in comparison to conventional IBRS  
289 patients.

290 A-ALDS provides a stable, double-layered vascularized tissue cover for the implant. This likely  
291 allows effective in situ placement of the implant in the breast pocket with robust mechanical  
292 stability and helps in symmetrization with the contralateral breast.

293 The A-ALDS was performed by advancing the de-epithelized dermal sling over the implant by  
294 mobilizing the skin and subcutaneous tissue from the lower thoracic and upper abdominal wall.  
295 This modification results in the recreation of a well-defined IMF to facilitate symmetry *vis-svis*  
296 shape and size with contralateral breast. In our technique, the A-ALDS flap was sutured with  
297 pectoralis major/serratus anterior muscle to provide desired expansion to the lower pole for  
298 implant placement that provides mechanical stability to the implant. The A-ALDS flap allows  
299 the expansion of the inferior pole of the pocket and prevents high riding of the implant. Hence,  
300 this modification provides a good contour and natural shape and symmetry to the breast. It is  
301 well reported that thoraco-epigastric flaps maintain vascularity from perforators of the  
302 intercostal, lumbar, epigastric arcade and inferior epigastric arteries. As a result, these flaps  
303 have been previously used in correcting mastectomy defects by small volume replacements  
304 [10].

305 We now present evidence of successful use of A-ALDS flap in breast reconstruction without  
306 detaching and advancing it by preserving the vascularity. In our cohort, A-ALDS patients  
307 demonstrated significantly higher aesthetic scores ( $6.7 \pm 1.3$  versus  $4.6 \pm 2.3$ ,  $p=0.009$ )  
308 compared with conventional IBRS after a 12 month follow-up.

309  
310 In addition to optimal post-surgery outcomes, patient acceptance of the A-ALDS technique is  
311 equally important. The PROMs (Breast-Q) data from our study indicates significantly higher  
312 satisfaction with sexual well-being in patients who have undergone reconstruction with the A-  
313 ALDS technique. Other parameters such as satisfaction with breast, satisfaction with outcome  
314 and psycho-social well-being showed a positive trend in favor of A-ALDS-based  
315 reconstruction.

316 Based on these observations, we hypothesize that use of A-ALDS flap with an implant may  
317 provide a viable, vascularized tissue cover to the implant. This flap lowers the risk of implant  
318 exposure, thereby, lowering the rates of implant loss and capsular contracture. This well  
319 vascularized autologous flap is expected to render the tissue environment more favorable for  
320 implant placement and improve wound healing, thereby reducing the risks of fibrosis, capsular  
321 contracture, wound breakdown, infection and may reduce the implant related complication after  
322 RT [11]. By extension, the higher complication rate in our study patients who have undergone  
323 conventional IBRS may be attributed to the thin fascia covering the implant, which may  
324 predispose the implant to exposure in case of infection or necrosis.

325 In low-resource settings such as India, ADMs are not yet available. This prompted us to  
326 innovate the breast reconstruction technique for women with small breasts using the A-ALDS  
327 technique. Indeed, our collective results indicating superior cosmetic scores, lower rates of

328 immediate complications and trend towards better patient acceptance after A-ALDS based  
329 reconstruction are encouraging. It is conceivable that our novel A-ALDS technique may  
330 provide a cost-effective alternative to ADM based IBRS. The economic advantage of this  
331 ALDS technique is apparent as it can be performed in a single setting without compromising  
332 the patient outcomes and obviating the need for contralateral procedure.

333 Our main aim was to report the surgical details of the innovative A-ALDS based IBRS  
334 procedure in small or minimally ptotic breasts. We propose that the A-ALDS based IBRS  
335 procedure may be routinely employed in the patients with small breasts that will ensure a good  
336 cosmetic outcome with minimal early complications, no implant loss and lesser capsular  
337 contracture rate with an overall positive impact on quality of life.

338 Despite the important findings, our study has few limitations. This study represents the post  
339 IBRS follow-up data only for a period of 12 months. To substantiate the promising clinical and  
340 PROMs observations, long-term follow-up i.e., 3 to 5 years post-surgery in the same cohort is  
341 needed. Secondly, this study represents a single-institutional cohort in which all A-ALDS  
342 procedures were performed by the same surgical team which may represent investigator bias.  
343 To validate our observations and minimize bias, this study needs to be replicated in multi-  
344 centric settings.

345

## 346 **CONCLUSION**

347 In conclusion, our study reports application of a novel A-ALDS technique for implant-based  
348 breast reconstruction in small, non/minimally ptotic small breasts. Preliminary observations  
349 from post-surgery evaluations and PROMs demonstrate that A-ALDS technique may  
350 potentially reduce post-surgery complications, improve aesthetic outcomes and improve

351 overall patient satisfaction. This technique may serve as a cost-effective alternative to ADM-  
352 based reconstruction in low resource settings. Long-term follow-up and study replication in  
353 other breast surgery units will be necessary for further substantiating our early observations.

354

#### 355 **DATA AVAILABILITY**

356 All data will be available and can be shared on request. Supplementary tables and figures are  
357 provided in support of data presented in the manuscript.

#### 358 **CONFLICTS OF INTEREST STATEMENT**

359 The author declares no competing interests.

360

#### 361 **ACKNOWLEDGMENTS**

362 The study authors would like to thank all participants who consented to participate in this study.  
363 We also acknowledge Bajaj Auto Ltd. for providing support to research activities at  
364 PCCM ( Grant #PCCM529). We express our appreciation to Dr. Madhura Kulkarni , Dr. Dhara  
365 Patel and Dr.Sneha Joshi for their help in editing the manuscript. We are grateful to the MAPI  
366 Research Trust for permission to use BREAST-Q (<http://www.mapitrust.org>). We would also  
367 like to thank the management and staff of Ruby Hall Clinic, Pune where all surgeries were  
368 performed.

#### 369 **ETHICAL APPROVAL**

370 Study approval was granted by the Independent ethics committee of Prashanti Cancer Care  
371 Mission. Independent Ethics Committee of Prashanti Cancer Care Mission ( DCGI/CDSCO  
372 Registration Number : ECR/298/Indt/MH/2018 (dated May 14 2018)

373

374 **CONSENT**

375 All subjects gave their consent for the use of their personal and medical information  
376 including images in the publication of this study.

377 **FOOTNOTE**

378 A part of this work was presented as a poster at the Breast Cancer Coordinated Care conference  
379 in Washington, DC on March 1-3, 2018.

380

381

382

383

384

385

386

387

388

389

390

391

392 **REFERENCES**

393 1. Dietz J, Lundgren P, Veeramani A, O'Rourke C, Bernard S, Djohan R, et al.

394 Autologous inferior dermal sling (autoderm) with concomitant skin-envelope

395 reduction mastectomy: an excellent surgical choice for women with macromastia and

396 clinically significant ptosis.

397

398 2. Ann Surg Oncol. 2012; 19(10):3282-8. King IC, Harvey JR, Bhaskar P. One-Stage

399 Breast Reconstruction Using the Inferior Dermal Flap, Implant, and Free Nipple

400 Graft. Aesthetic Plast. Surg. 2014; 38(2):358-64.

401 3. Roy PG. Modified Lower Pole Autologous Dermal Sling for Implant Reconstruction

402 in Women Undergoing Immediate Breast Reconstruction after Mastectomy. Int. J

403 Breast Cancer. 2016; 2016:9301061

404

405 4. Spear SL, Sher SR, Al-Attar A. Focus on technique: supporting the soft-tissue

406 envelope in breast reconstruction. Plast Reconstr Surg. 2012; 130(5 Suppl 2):89S–

407 94S

408

409 5. Rusby JE, Smith BL, Gui GP. Nipple-sparing mastectomy.Br J Surg. 2010 M;

410 97(3):305-16.

411 6. Spear SL, Baker JL Jr. Classification of capsular contracture after prosthetic breast

412 reconstruction. Plast Reconstr Surg. 1995; 96(5): 1119-24.



413 7. Shekhawat L, Busheri L, Dixit S, Patel C, Dhar U, Koppiker C. Patient -Reported  
414 Outcomes Following Breast Reconstruction Surgery and Therapeutic Mammoplasty:  
415 Prospective Evaluation 1 Year Post-Surgery with BREAST-Q Questionnaire; Indian J  
416 Surg Oncol 2015; 28 (2): 121-27.

417 8. Pusic AL, Klassen AF, Scott AM, Klok JA, Cordeiro PG, Cano SJ. Development of a  
418 new patient-reported outcome measure for breast surgery: the BREAST-Q. *Plast*  
419 *Reconstr Surg*. 2009; 124(2):345-53.

420

421 9. Nguyen KT, Mioton LM, Smetona JT, Seth AK, Kim JY. Esthetic outcomes of  
422 ADM- assisted expander-implant breast reconstruction. *Eplasty*. 2012; 12:e58.

423

424 10. Evan Matros, Joseph J. Disa. Uncommon flaps for chest wall reconstruction.  
425 *Semin Plast Surg*.2011 25(1): 55–59.

426 11. Chang DW, Barnea Y, Robb GL. Effects of an autologous flap combined with an  
427 implant for breast reconstruction: an evaluation of 1000 consecutive reconstructions  
428 of previously irradiated breasts. *Plast Reconstr Surg*. 2008; 122(2):356–62.

429

430

431

432

433

434 **SUPPLEMENTARY MATERIAL**

435 **Supplementary Videos**

436 **Koppiker etal -A-ALDS Video 1.mp4 : Pre-Operative Marking and Creation of A-ALDS**

437 **Flap**

438 Pre-Operative markings and skin de-epithelisation to form A-ALDS flap.

439 **Koppiker etal -A-ALDS Video 2.mp4 : Mastectomy**

440 Mastectomy is carried out with the removal of breast tissue.

441 **Koppiker etal -A-ALDS Video 3.mp4 : Correction of Completely Vascularized Pocket**

442 **with A-ALDS Technique**

443 Implant is placed in sub-pectoral pocket and advancement of A-ALDS flap. Pectoralis major

444 and serratus anterior muscle are sutured to de-epithelialised A-ALDS to create a complete

445 vascularized cover.

446

447

448

449

450

451

452

453

454

455

456

457 **SUPPLEMENTARY TABLE**

458 Aesthetic 3-Point Outcome Score

| <b>Category</b>                               | <b>0</b>                                              | <b>1</b>                                                                          | <b>2</b>                                                         |
|-----------------------------------------------|-------------------------------------------------------|-----------------------------------------------------------------------------------|------------------------------------------------------------------|
| <b>Volume</b>                                 | Marked discrepancy relative to the contralateral side | Mild differences in Volume relative to the Contralateral Side                     | Minimal Differences in volume relative to The Contralateral Side |
| <b>Contour</b>                                | Marked contour deformity or shape asymmetry           | Mild differences in Contour deformity or Shape Asymmetry                          | Minimal Differences in contour deformity or Shape Asymmetry      |
| <b>Placement</b>                              | Marked displacement of breast mound                   | Mild Displacement of breast Mound                                                 | Minimal Displacement of breast Mound                             |
| <b>Scarring</b>                               | Hypertrophic scars and evident contracture            | Fair scarring (poor color match or wide scars without Hypertrophy Or contracture) | Thin scars                                                       |
| <b>Infra-Mammary Fold</b>                     | Poorly defined infra-Mammary fold                     | Defined but Asymmetrical infra-Mammary Fold                                       | Symmetrical infra-Mammary Folds                                  |
| Nguyen et al. <i>Eplasty</i> 2012; 5:486–492. |                                                       |                                                                                   |                                                                  |

459

460

461

462

**Figure 1A**

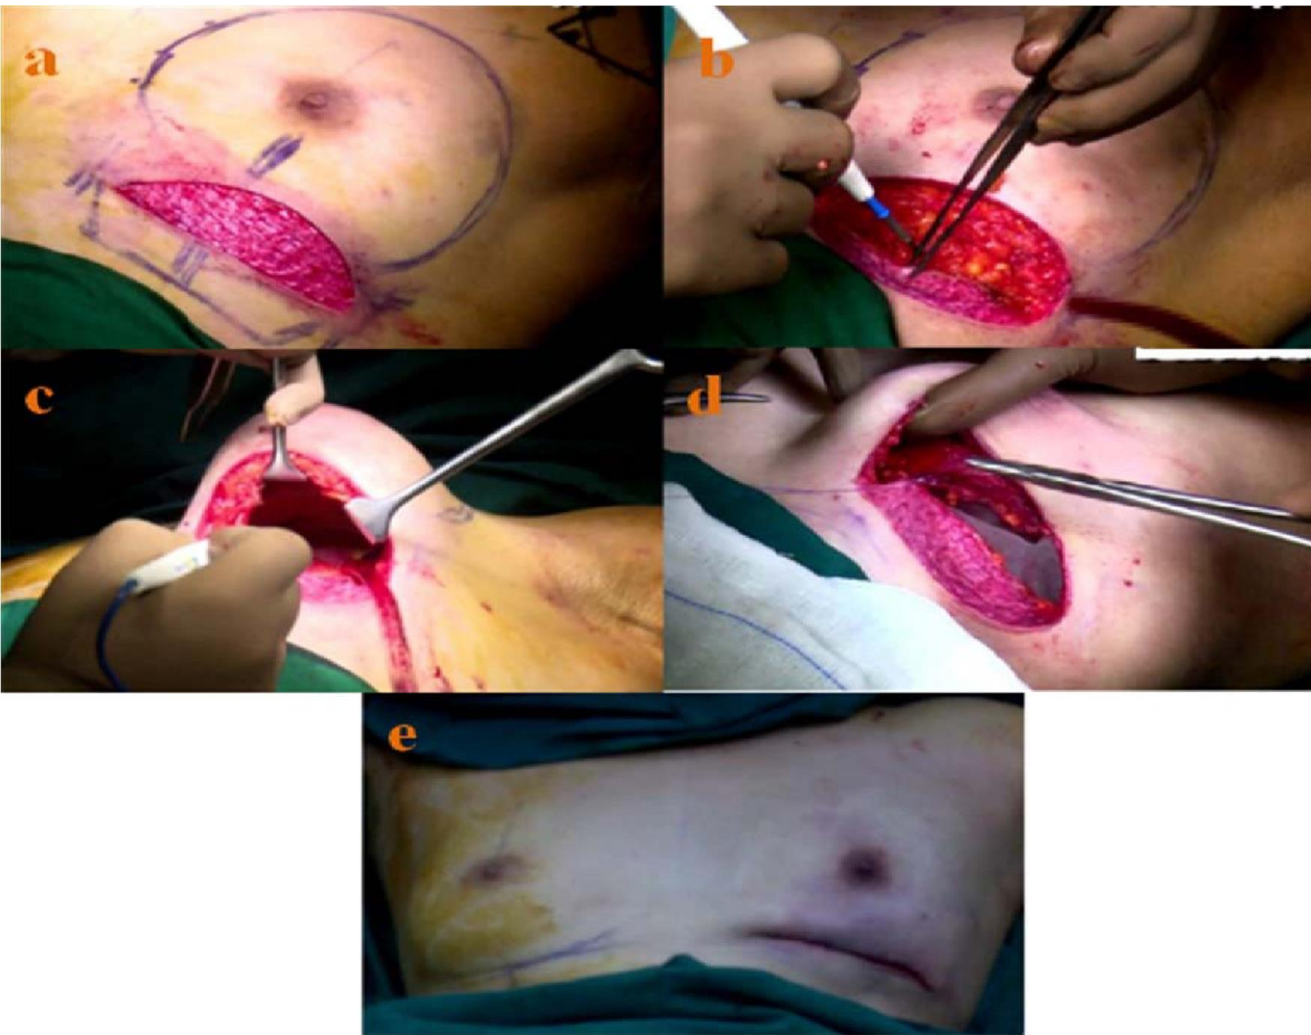

**Figure 1: Representative Case Study for A-ALDS based IBRS**

1A. Intraoperative Images

- a) De-epithelialization of lower dermal flap from IMF to 3 cm onto the breast
- b) Advancement of lower dermal flap to create of new-IMF by mobilizing skin from lower thoracic and upper abdominal wall
- c) Formation of subpectoral pocket
- d) Insertion of implant under pectoralis major muscle
- e) Completion of IBRS with A-ALDS procedure after skin suturing.

**Figure 1B**

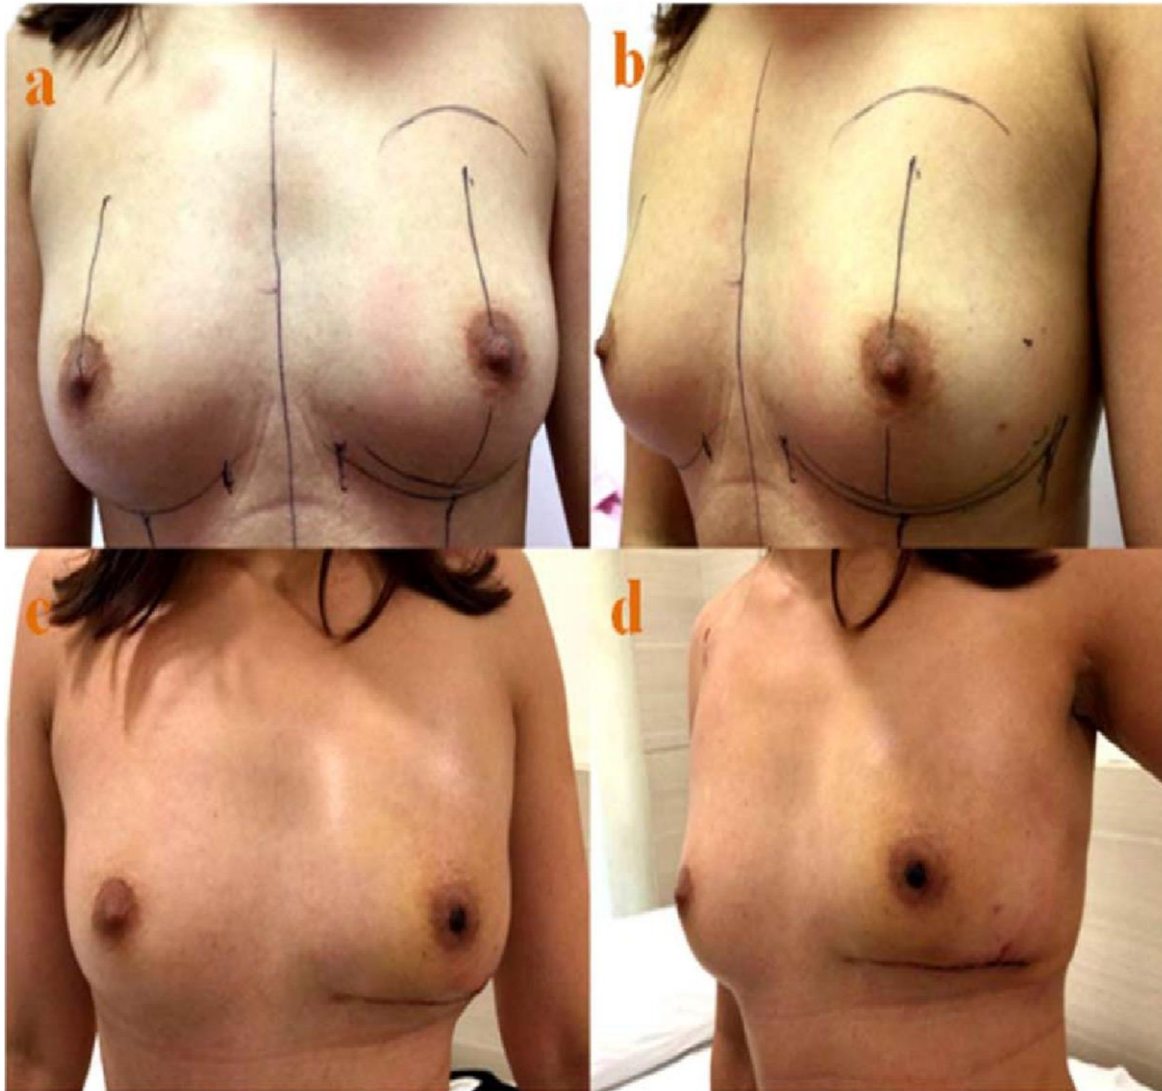

**1B. Pre-operative and Post-operative Images**

a, b) Pre-operative images

c, d) Post-operative images after 1 months of the surgery. Lower pole flattening seen in early phase.

**Figure 1C**

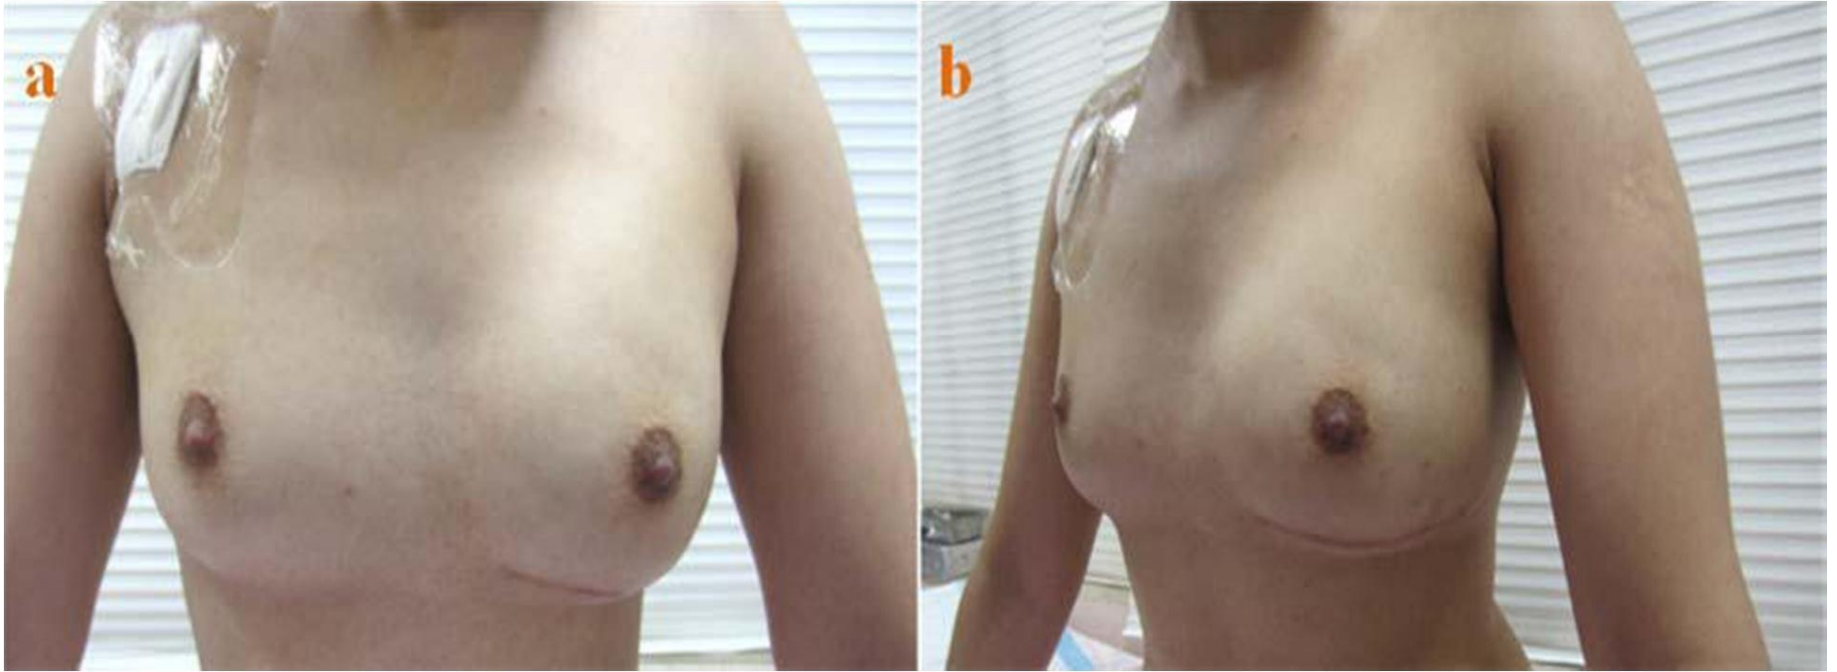

**1C. Post-operative Image of the same patient after 3 months follow-up**

a, b) Post-operative images after 3 months of the surgery and Lower pole fullness achieved.



**Figure 1D**

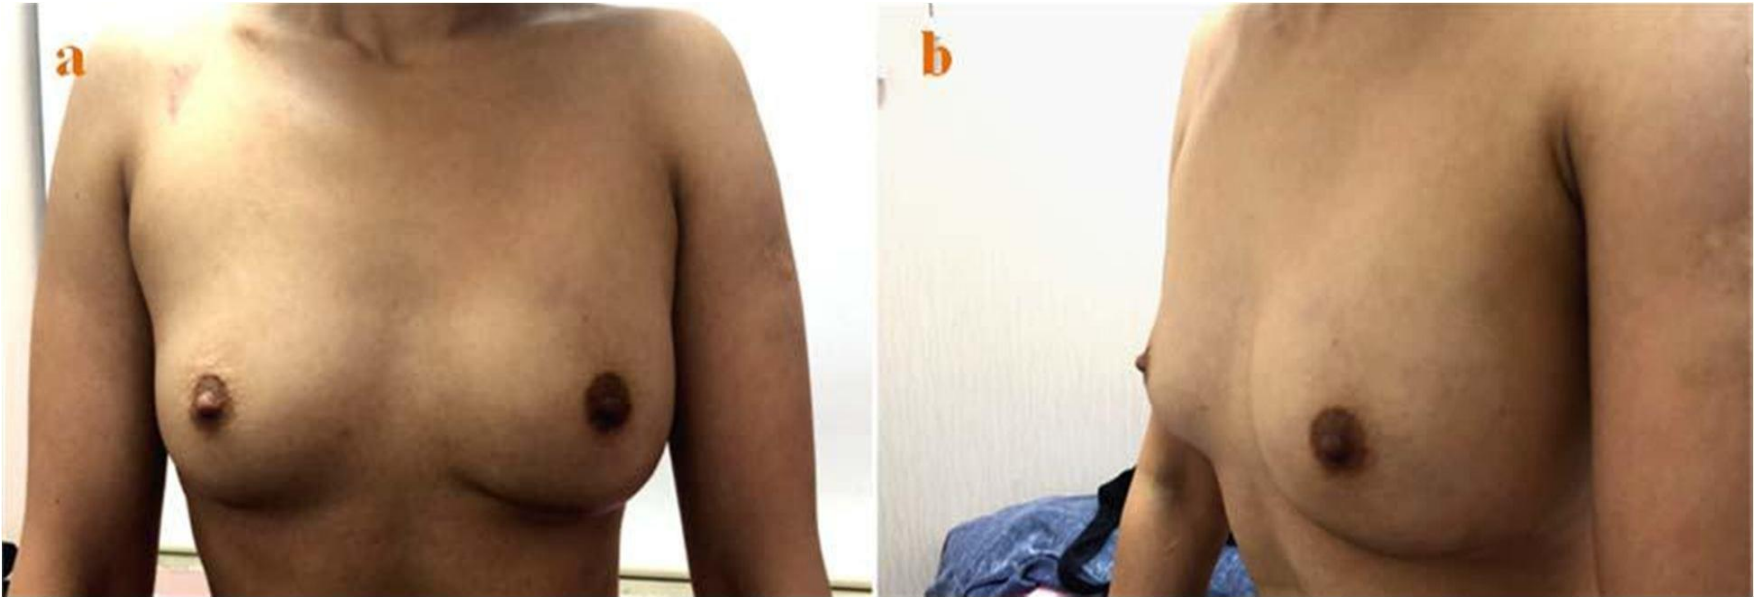

**1D. Post-operative Image of the same patient after 1 year follow-up**  
a, b) Post-operative images after 1 year of the surgery.



**Figure 2 : Study Flow Chart : Distribution of Study Participants**

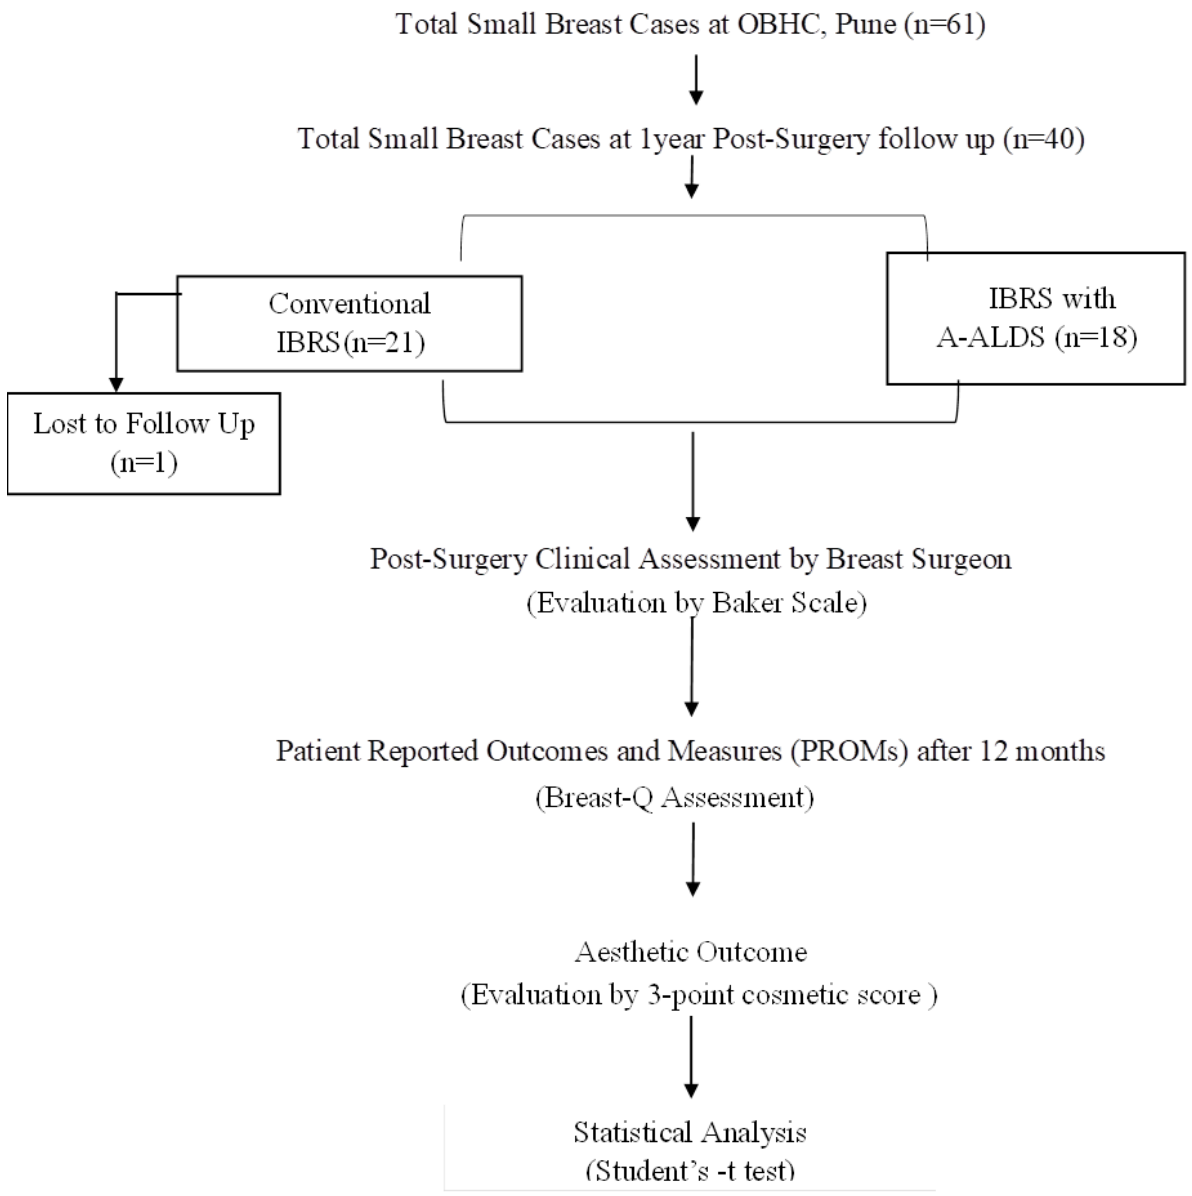

Source: https://medrxiv.org/content/10.1101/2021.05.09.21255654v1.full.pdf
